# Supplementary material for: Quality markers based on chromatographic fingerprinting and anti-neuroinflammatory screening: A spectrum–effect correlation for Nardostachys jatamansi DC. with anti-neuroinflammatory potential
Source: Research Square preprint supplement (doi:10.21203/rs.3.rs-3840056/v1), 2024-01-10
Supplement: Supplementary file 1 [file bf7fccb9474adff65168ebb5.docx]

## Supplementary Materials

**Quality markers based on chromatographic fingerprinting and** **anti-neuroinflammatory screening: A** **spectrum–effect correlation for** ***Nardostachys jatamansi* DC. with anti-neuroinflammatory potential**

Bian-Xia Xuea,**1**, Xiao-Jie Liua,**1**, Cong-Yan Duan a,**1**, Li-Hua Zhanga, Shao-Xia Wangb,*****, Hong-Hua Wua,c,*****

*a* *State Key Laboratory of Component-based Chinese Medicine, Tianjin University of Traditional Chinese Medicine, 10 Poyanghu Road, West Area, Tuanbo New Town, Jinghai District, Tianjin 301617, People's Republic of China*

*b* *School of Medical Technology, Tianjin University of Traditional Chinese Medicine, 10 Poyanghu Road, West Area, Tuanbo New Town, Jinghai District, Tianjin 301617, People's Republic of China*

*c**Tianjin Key Laboratory of Therapeutic Substance of Traditional Chinese Medicine, Tianjin University of Traditional Chinese Medicine, 10 Poyanghu Road, West Area, Tuanbo New Town, Jinghai District, Tianjin 301617, People's Republic of China*

*** Corresponding authors:**

**Shao-Xia Wang**, School of Medical Technology, Tianjin University of Traditional Chinese Medicine, 10 Poyanghu Road, West Area, Tuanbo New Town, Jinghai District, Tianjin 301617, People's Republic of China

*E-mail address*: wangshaoxia1@163.com (S.-X. Wang)

*Telephone:* +86 022 59596597

**Hong-Hua Wu**, Institute of Traditional Chinese Medicine, Tianjin University of Traditional Chinese Medicine, 10 Poyanghu Road, West Area, Tuanbo New Town, Jinghai District, Tianjin, 301617, People's Republic of China

*E-mail address*: wuhonghua2011@tjutcm.edu.cn (H.-H. Wu)

*Telephone:* +86 022 59791833

**1 Co-first authors:**

B.-X. Xue, X.-J. Liu, and C. Y. Duan contributed equally to this work and should be considered co-first authors.

**S1. Method validation** **of UPLC chromatographic fingerprint**

The UPLC method was validated for the methodological investigation of precision, repeatability, and stability. The precision was assessed by six successive injections of the same NJ_1A sample. The repeatability was investigated by injecting six independent solutions obtained from the same NJ_1A sample. The stability was confirmed by repeatedly injecting the same NJ_1A sample solution stored in UPLC autosampler at 10 ℃ at 0, 2, 4, 6, 8, 10, 12, and 24 h in a day.

**S2. Similarity evaluation of UPLC chromatographic fingerprint**

Chromatographic data of multi-batches of NJ_1A samples were imported into the software of Similarity Evaluation System for Chromatographic Fingerprints of Traditional Chinese Medicines (Version 2012A) to establish the corresponding fingerprints. A representative standard fingerprint was automatically calculated and generated with the cosine similarity between the reference fingerprint and the sample fingerprints. The median method was employed with a time width of 0.1. Peaks with good resolution and intensity were assigned as the common peaks. Then the matching of the marker peaks was carried out by multi-point correction. The similarity of a fingerprint was represented by the correlation coefficient, and its value closer to 1 indicates that the similarity between the reference and the observed fingerprint is relatively higher.

**Table S1**

Geographical sources and batch numbers of the eighteen *N. jatamansi*.

| **No.** | **Batch number** | **Source** |
| --- | --- | --- |
| GS1 | 2021105213 | Beijing |
| GS2 | 220301092 | Anguo, Hebei |
| GS3 | 220401 | Bozhou, Anhui |
| GS4 | 20211001 | Anguo, Hebei |
| GS5 | 2010027 | Yunpanshan, Ningxia |
| GS6 | 20211023 | Chizhou, Anhui |
| GS7 | B206041260010 | Beijing |
| GS8 | 2020102341 | Tianjin |
| GS9 | B206041260003 | Bozhou, Anhui |
| GS10 | B206041260015 | Anguo, Hebei |
| GS11 | B206041260021 | Kunming, Yunnan |
| GS12 | B206041260002 | Yulin, Guangxi |
| GS13 | B206041260024 | Anguo, Hebei |
| GS14 | B206041260004 | Changsha, Hunan |
| GS15 | B206041260011 | Bozhou, Anhui |
| GS16 | B206041260008 | Dashiba, Chongqing |
| GS17 | B206041260023 | Bozhou, Anhui |
| GS18 | B206041260017 | Anguo, Hebei |

**Table S2**

The extraction rate of 18 batches of NJ_1, NJ_1A and NJ_1B

| **No.** | **NJ-1** | | **NJ-1A** | | **NJ-1B** | |
| --- | --- | --- | --- | --- | --- | --- |
| **Weight (g)** | **Extraction rate (%)** | **Weight(g)** | **Extraction rate (%)** | **Weight (g)** | **Extraction rate (%)** |
| GS1 | 3.8498 | 19.25 | 2.7760 | 13.88 | 1.7816 | 8.91 |
| GS2 | 4.4244 | 22.12 | 2.7919 | 13.96 | 1.0989 | 5.50 |
| GS3 | 4.1191 | 20.60 | 2.1714 | 10.86 | 1.7219 | 8.61 |
| GS4 | 4.1303 | 20.65 | 2.4514 | 12.26 | 0.9029 | 4.52 |
| GS5 | 3.3650 | 16.83 | 2.5789 | 12.90 | 1.0045 | 5.02 |
| GS6 | 6.4777 | 32.39 | 2.3529 | 11.77 | 1.1561 | 5.78 |
| GS7 | 4.3097 | 21.55 | 2.8308 | 14.15 | 2.1820 | 10.91 |
| GS8 | 4.2715 | 21.36 | 2.5281 | 12.64 | 1.0518 | 5.26 |
| GS9 | 4.4400 | 22.20 | 2.3829 | 11.92 | 1.1116 | 5.56 |
| GS10 | 4.2063 | 21.03 | 3.2342 | 16.17 | 1.5898 | 7.95 |
| GS11 | 3.1454 | 15.73 | 2.1118 | 10.56 | 0.9125 | 4.56 |
| GS12 | 3.5806 | 17.90 | 2.3259 | 11.63 | 1.0498 | 5.25 |
| GS13 | 3.6178 | 18.09 | 1.5723 | 7.862 | 1.7938 | 8.97 |
| GS14 | 4.4467 | 22.23 | 2.3756 | 11.88 | 1.8889 | 9.45 |
| GS15 | 4.8338 | 24.17 | 2.8507 | 14.25 | 1.6567 | 8.28 |
| GS16 | 4.6496 | 23.25 | 2.8811 | 14.41 | 1.4135 | 7.07 |
| GS17 | 3.8136 | 19.07 | 2.0100 | 10.05 | 1.5602 | 7.80 |
| GS18 | 5.4546 | 27.27 | 2.4865 | 12.43 | 2.0097 | 10.05 |

**Table S3**

Precision result of the UPLC–PDA fingerprinting method of NJ_1A.

| **Peaks** | **Relative peak area (%)** | | | | | | **Mean value** | **RSD (%)** |
| --- | --- | --- | --- | --- | --- | --- | --- | --- |
| **1** | **2** | **3** | **4** | **5** | **6** |
| 1 | 0.23 | 0.23 | 0.23 | 0.23 | 0.23 | 0.23 | 0.23 | 0.6 |
| 2 | 0.27 | 0.27 | 0.27 | 0.27 | 0.27 | 0.27 | 0.27 | 0.1 |
| 3 | 0.23 | 0.23 | 0.23 | 0.23 | 0.23 | 0.23 | 0.23 | 0.2 |
| 4 | 0.42 | 0.42 | 0.42 | 0.42 | 0.41 | 0.42 | 0.42 | 0.4 |
| 5(S) | 1.00 | 1.00 | 1.00 | 1.00 | 1.00 | 1.00 | 1.00 | 0.0 |
| 6 | 0.16 | 0.16 | 0.16 | 0.16 | 0.16 | 0.16 | 0.16 | 0.3 |

**Table S4**

Repeatability result of the UPLC–PDA fingerprinting method of NJ_1A.

| **Peaks** | **Relative peak area (%)** | | | | | | **Mean value** | **RSD (%)** |
| --- | --- | --- | --- | --- | --- | --- | --- | --- |
| **1** | **2** | **3** | **4** | **5** | **6** |
| 1 | 0.19 | 0.19 | 0.19 | 0.19 | 0.19 | 0.19 | 0.19 | 0.2 |
| 2 | 0.23 | 0.23 | 0.23 | 0.23 | 0.23 | 0.23 | 0.23 | 0.2 |
| 3 | 0.20 | 0.20 | 0.20 | 0.20 | 0.20 | 0.20 | 0.20 | 0.1 |
| 4 | 0.39 | 0.39 | 0.39 | 0.39 | 0.39 | 0.39 | 0.39 | 0.1 |
| 5(S) | 1.00 | 1.00 | 1.00 | 1.00 | 1.00 | 1.00 | 1.00 | 0.0 |
| 6 | 0.16 | 0.16 | 0.16 | 0.16 | 0.16 | 0.16 | 0.16 | 0.2 |

**Table S5**

Stability result of the UPLC–PDA fingerprinting method of NJ_1A.

| **Peaks** | **Relative peak area (%)** | | | | | | | | **Mean value** | **RSD (%)** |
| --- | --- | --- | --- | --- | --- | --- | --- | --- | --- | --- |
| **0 h** | **2 h** | **4 h** | **6 h** | **8 h** | **10 h** | **12 h** | **24 h** |
| 1 | 0.19 | 0.19 | 0.19 | 0.19 | 0.19 | 0.19 | 0.19 | 0.19 | 0.19 | 0.5 |
| 2 | 0.24 | 0.24 | 0.24 | 0.24 | 0.24 | 0.23 | 0.24 | 0.24 | 0.24 | 0.6 |
| 3 | 0.20 | 0.20 | 0.20 | 0.20 | 0.20 | 0.20 | 0.20 | 0.20 | 0.20 | 0.8 |
| 4 | 0.39 | 0.39 | 0.39 | 0.39 | 0.39 | 0.39 | 0.39 | 0.39 | 0.39 | 0.3 |
| 5(S) | 1.00 | 1.00 | 1.00 | 1.00 | 1.00 | 1.00 | 1.00 | 1.00 | 1.00 | 0.0 |
| 6 | 0.16 | 0.16 | 0.16 | 0.16 | 0.16 | 0.16 | 0.16 | 0.16 | 0.16 | 0.9 |

**Table S6**

The similarity analysis results of 18 batches of the UPLC–PDA fingerprints for NJ_1A

| **No.** | **Similarity** |
| --- | --- |
| GS-1 | 0.986 |
| GS-2 | 0.971 |
| GS-3 | 0.970 |
| GS-4 | 0.993 |
| GS-5 | 0.990 |
| GS-6 | 0.992 |
| GS-7 | 0.975 |
| GS-8 | 0.948 |
| GS-9 | 0.464 |
| GS-10 | 0.884 |
| GS-11 | 0.664 |
| GS-12 | 0.773 |
| GS-13 | 0.339 |
| GS-14 | 0.887 |
| GS-15 | 0.540 |
| GS-16 | 0.949 |
| GS-17 | 0.849 |
| GS-18 | 0.863 |

**Table S7**

The result of GCA between UPLC spectrum and the anti- neuroinflammatory activity of NJ_1A.

| **No.** | **Correlation degree (*r*)** | **No.** | **Correlation degree (*r*)** |
| --- | --- | --- | --- |
| P1 | 0.875405 | P12 | 0.901014 |
| P2 | 0.902251 | P13 | 0.75984 |
| P3 | 0.811544 | P14 | 0.916123 |
| P4 | 0.778576 | P15 | 0.917296 |
| P5 | 0.873605 | P16 | 0.895573 |
| P6 | 0.807011 | P17 | 0.831707 |
| P7 | 0.814424 | P18 | 0.931505 |
| P8 | 0.83672 | P19 | 0.896524 |
| P9 | 0.876415 | P20 | 0.944104 |
| P10 | 0.86497 | P21 | 0.907813 |
| P11 | 0.852826 |  |  |

**Table S8**

The result of PLSR between UPLC spectrum and the anti- neuroinflammatory activity of NJ_1A.

| **No.** | **Regression coefficient (*****r* ¢)** | **No.** | **Regression coefficient (*r* ¢)** |
| --- | --- | --- | --- |
| P1 | -0.4871344 | P12 | 0.1004871 |
| P2 | 0.26625894 | P13 | -0.052741 |
| P3 | 0.03850134 | P14 | 0.1870354 |
| P4 | 0.10614717 | P15 | 0.21572 |
| P5 | 0.13426187 | P16 | -0.196074 |
| P6 | -0.2098458 | P17 | 0.0988268 |
| P7 | 0.07826916 | P18 | 0.337052 |
| P8 | -0.0661376 | P19 | 0.1552577 |
| P9 | -0.221544 | P20 | 0.2319301 |
| P10 | 0.17949466 | P21 | -0.026422 |
| P11 | 0.05700635 |  |  |


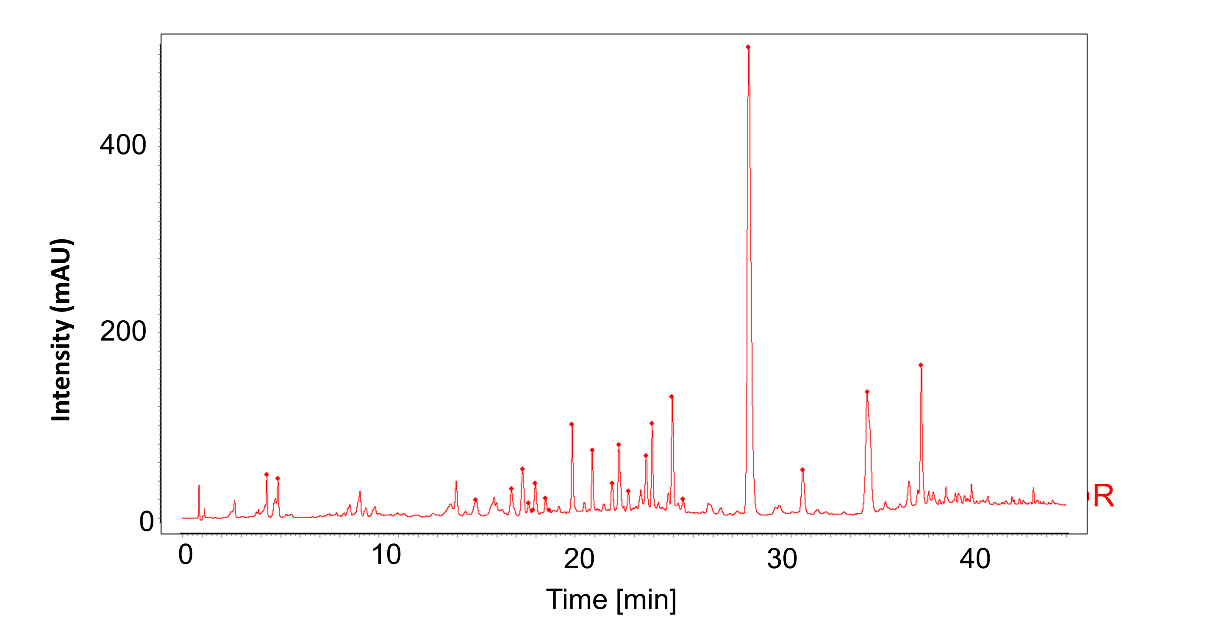


**Figure S1** The reference chromatogram of NJ_1A*.*

**
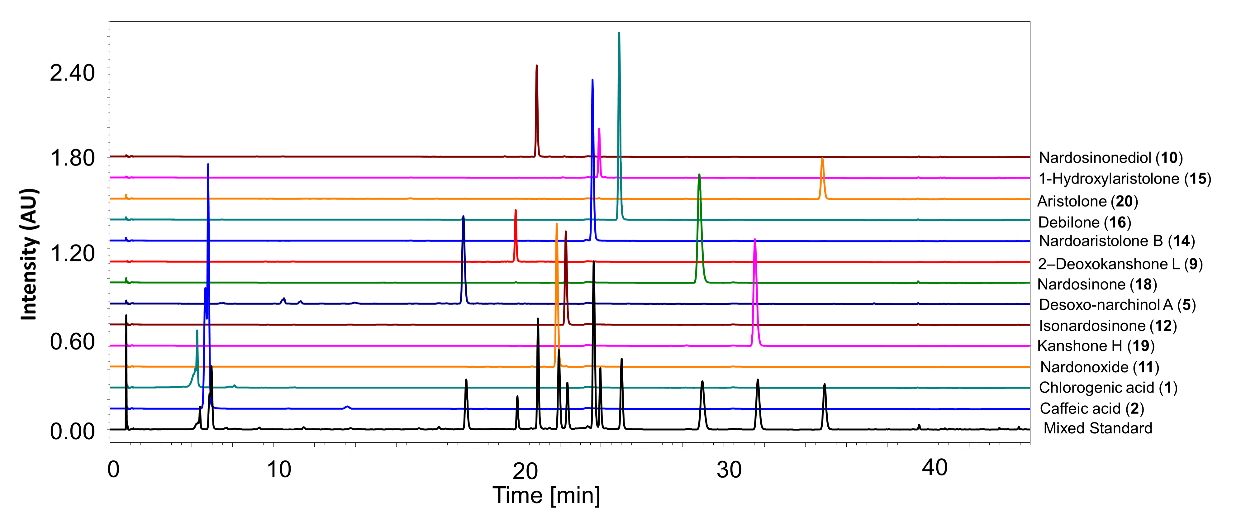
**

**Figure S2** The stacked UPLC chromatograms of the 13 single standard and mixed standard
